# Supplementary material
Source: PubMed Central journal article supplement (PMC6181630)
Supplement: fj.201800351R.sf1.pdf [file fj.201800351R.sf1.pdf]

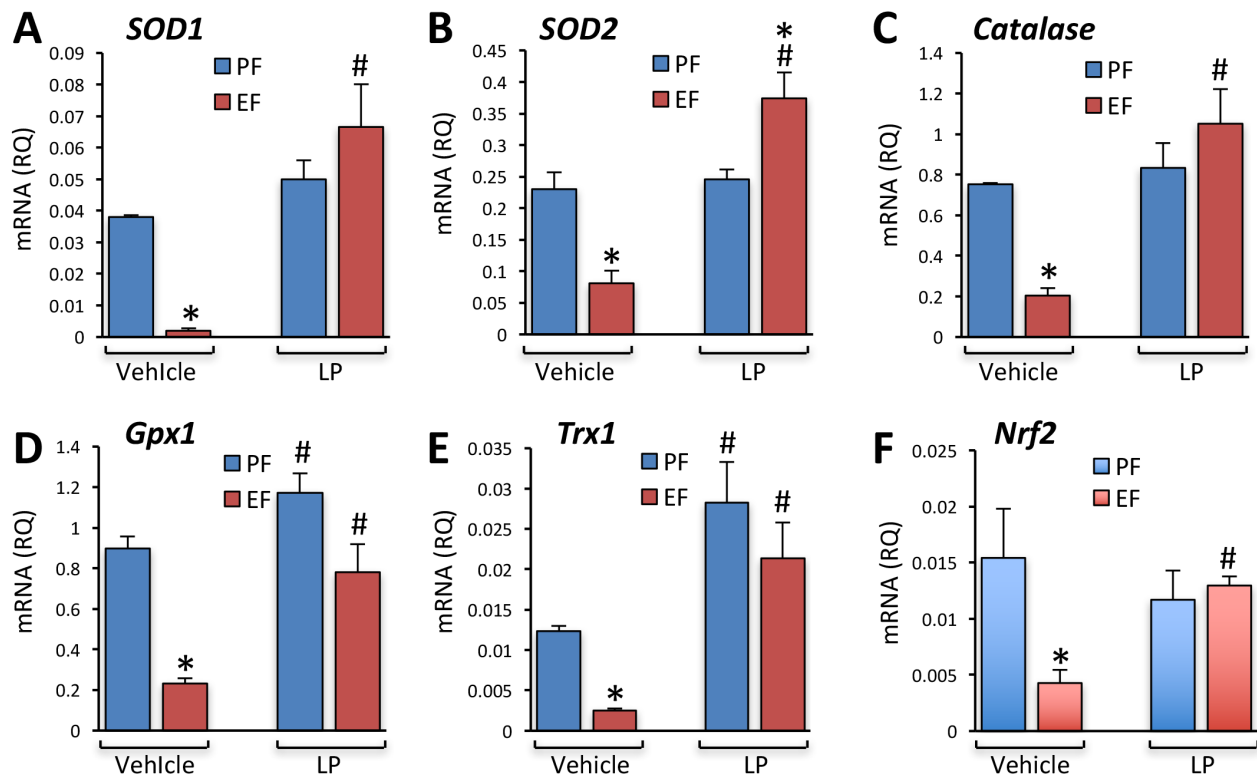

Figure S1: *L. plantarum* attenuates CEF-induced suppression of antioxidant gene expression in mouse liver. Adult female mice were fed a liquid diet with EtOH (EF) or isocaloric maltodextrin (PF) and with or without *L. plantarum* ( $10^6$  cfu/ml) (LP). RNA extracted from liver was subjected to qPCR for SOD1 (A), SOD2 (B), Catalase (C), Gpx1 (D), Trx1 (E) and Nrf2 (F). Values are mean  $\pm$  sem (n = 6). Asterisks indicate the values that are significantly ( $p < 0.05$ ) different from corresponding PF values, and hash tags indicate the values different from corresponding EF values.
